1 **Bivariate analysis of barley scald resistance with relative maturity**  
2 **reveals a new major QTL on chromosome 3H**

3 Xuechen Zhang<sup>1</sup>, Ben Ovenden<sup>1</sup>, Beverley A. Orchard<sup>1</sup>, Meixue Zhou<sup>2</sup>, Robert F. Park<sup>3</sup>,  
4 Davinder Singh<sup>3</sup> and Andrew Milgate<sup>1\*</sup>

5 <sup>1</sup>NSW Department of Primary Industries, Wagga Wagga Agricultural Institute, Wagga  
6 Wagga NSW 2650 Australia

7 <sup>2</sup>Tasmanian Institute of Agriculture, University of Tasmania, Private Bag 1375, Prospect,  
8 TAS 7250 Australia

9 <sup>3</sup>Plant Breeding Institute, The University of Sydney, Cobbitty, Private Bag 4011, Narellan,  
10 NSW 2567 Australia

11 \* Corresponding author Email: [andrew.milgate@dpi.nsw.gov.au](mailto:andrew.milgate@dpi.nsw.gov.au) Phone: +61 2 69381990

12 Andrew Milgate ORCID/Researcher ID: 0000-0001-6237-9018

13 Xuechen Zhang ORCID/Researcher ID: 0000-0001-9121-4802

14 Ben Ovenden ORCID/Researcher ID: 0000-0003-2015-1650

15

16 **Abstract**

17 The disease scald of barley is caused by the pathogen *Rhynchosporium commune* and can  
18 cause up to 30-40% yield loss in susceptible varieties. In this study, the Australian barley  
19 cultivar Yerong was demonstrated to have resistance that differed from Turk (*Rrs1*) based on  
20 seedling tests with 11 *R. commune* isolates. A doubled haploid population with 177 lines  
21 derived from a cross between Yerong and Franklin was used to identify quantitative trait loci  
22 (QTL) for scald resistance. Scald resistance against four pathogen isolates was assessed at the  
23 seedling growth stage in a glasshouse experiment and at the adult growth stage in field  
24 experiments with natural infection over three consecutive years. A QTL on chromosome 3H  
25 was identified with large effect, consistent with a major gene conferring scald resistance at  
26 the seedling stage. Under field conditions, scald percentage was negatively correlated with  
27 early relative maturity. A bivariate analysis was used to model scald percentage and relative  
28 maturity together, residuals from the regression of scald percentage on relative maturity were  
29 used as our phenotype for QTL analysis. This analysis identified one major QTL on  
30 chromosome 3H, which mapped to the same position as the QTL identified for scald  
31 resistance at seedling stage. The identified QTL on 3H is proposed to be different from the  
32 *Rrs1* on the basis of seedling resistance against different *R. commune* isolates and physical  
33 map position. The analysis also identified an additional novel QTL on chromosome 7H. This  
34 study increases the current understanding of scald resistance and identifies genetic material  
35 possessing QTLs useful for the marker-assisted selection of scald resistance in barley  
36 breeding programs.

37 **Keywords:** scald, QTL, barley, bivariate model, mixed linear model.

38

## 39 **Introduction**

40 Scald is a serious foliar disease in barley (*Hordeum vulgare*) that is caused by  
41 *Rhynchosporium commune*. The pathogen can cause up to 30-40% yield loss in susceptible  
42 varieties and is found in all barley-growing regions worldwide <sup>1</sup>. Control of scald disease  
43 requires a multi-faceted approach, including application of fungicides, cultural disease  
44 management, manipulation of sowing date and the use of resistant cultivars <sup>2</sup>. *R. commune*  
45 populations have changed rapidly in response to newly-developed fungicides and resistant  
46 plant varieties <sup>3-6</sup>. One of the most sustainable strategies for *R. commune* management is to  
47 develop and deploy disease-resistant barley cultivars through the introgression and  
48 pyramiding of different resistance genes (major or minor). Traditional methods of phenotypic  
49 selection for complex patho-systems such as scald can be improved through detailed genetic  
50 studies, which allow the implementation of marker-assisted selection (MAS) in breeding  
51 programs.

52 Scald resistance is governed by both major and minor genes. Major resistance genes provide  
53 high levels of resistance at all plant growth stages, while minor resistance genes generally  
54 provide partial levels of resistance at the adult plant stage <sup>7,8</sup>. Reduced scald symptoms in  
55 adult stage plants under field conditions might also result from disease escape through  
56 physical barriers to infection <sup>9</sup>. In terms of scald resistance in barley, flowering time, plant  
57 height and canopy structure can affect scald symptoms by physically limiting the upward  
58 spread of the splash-dispersed pathogen <sup>8</sup>. The major scald resistance genes discovered so far  
59 have been mainly identified through experiments with seedlings via inoculation with specific  
60 isolates <sup>8</sup>. The problem with using major scald resistance genes in breeding programs is a lack  
61 of durability. Quantitative genes are thought to be more durable, and it has been suggested

62 that pyramiding these genes could reduce the ability of *R. communes* to rapidly acquire new  
63 virulence combinations<sup>10</sup>.

64 A large number of QTLs for scald resistance have been discovered in barley. Two genomic  
65 regions in particular have been frequently associated with resistance; the *Rrs1* locus on  
66 chromosome 3H and the *Rrs2* locus on chromosome 7H<sup>8,11</sup>. These two loci have been  
67 detected in different mapping populations, across different environments, under glasshouse  
68 conditions after inoculation with specific isolates, and under field conditions<sup>8,11</sup>. Progress of  
69 our understanding of these loci has been made through fine mapping studies<sup>12,13</sup>. It remains  
70 unknown if the QTLs detected at each of these two loci are alleles of the same gene, or if they  
71 are part of a closely linked gene cluster at each locus<sup>14,15</sup>.

72 For the *Rrs1* locus, multiple major and minor scald resistance genes or QTLs have been  
73 identified, supporting its importance in barley germplasm worldwide<sup>12,16-21</sup>. *Rrs1* was the  
74 first scald resistance gene reported in barley<sup>22</sup> with an associated RFLP marker of  
75 cMWG680, positioned at 455.3 Mb on chromosome 3H on the barley physical map<sup>18</sup>. The  
76 location of the *Rrs1* locus was further fine mapped including all known markers to an interval  
77 of less than 9 Mbp at 448.4 Mb from Spanish barley varieties<sup>12</sup>.

78 In this study, we performed screening against 11 *R. commune* isolates at seedling stage to  
79 demonstrate that resistance in the variety Turk (international source of *Rrs1*) differs from that  
80 resistance in the variety Yerong. These results contradicted previous findings that suggested  
81 Yerong carries a scald resistance QTL at the *Rrs1* locus on chromosome 3H<sup>23</sup>. To further  
82 investigate this finding, screening of a Yerong/Franklin doubled haploid population was  
83 conducted for seedling resistance against four *R. commune* isolates and adult plant resistance  
84 under natural field conditions across three years. To overcome potential confounding effects  
85 of differences in the onset of flowering (determined as relative maturity) on scald resistance

86 QTL detection within the population, a linear mixed model with a bivariate approach was  
87 used to analyse the field data. Using this approach, a major QTL on chromosome 3H from  
88 Yerong was detected for scald resistance at both seedling and adult plant stage. The QTL  
89 detected did not map to the *Rrs1* locus, suggesting the presence of a new and useful scald  
90 resistance QTL in Yerong.

## 91 **Materials and Methods**

### 92 *Differential varieties screening*

93 The seedling scald resistance of different barley varieties was tested against 11 *R. commune*  
94 isolates from the Wagga Wagga Agricultural Institute fungal isolate collection. These isolates  
95 were collected from southern New South Wales between 2013 and 2016 (Table 1). The *R.*  
96 *commune* isolates were grown on lima bean agar (LBA) at 20°C under 24 hour light  
97 condition <sup>7</sup>. After 2 to 3 weeks, spores were harvested with a scalpel blade and the spore  
98 solutions for spray inoculation were adjusted to  $2 \times 10^6$  spores ml<sup>-1</sup> in distilled water using a  
99 haemocytometer. Seeds of varieties were sown in 6-cm pots arrayed in a randomized  
100 complete block design consisting of 4 columns by 30 rows with three replicates of each  
101 genotype in each experiment for a total of 120 pots. A total of 40 varieties were included in  
102 the differential varieties screening, however, only the results for six key varieties (Yerong,  
103 Franklin, Turk, Atlas, Atlas46 and Litmus) were reported in this study (Table 2). Each variety  
104 by isolate combination was evaluated in at least two experiments. The responses of Turk  
105 (*Rrs1*), Atlas (*Rrs2*) and Atlas46 (both *Rrs1* and *Rrs2*) were compared with that of Yerong,  
106 while Litmus was used as the susceptible check variety. The barley varieties were uniformly  
107 sprayed with spore solutions at the 3-leaf-stage, and kept in a dark chamber for 48 hours at  
108 18°C with 100% humidity. The seedlings were scored 14 days post-inoculation with a

109 scoring scale from 1 to 5 (1 = resistant and 5 = very susceptible) following the methods of  
110 Jackson and Webster <sup>24</sup>.

111 *Plant material for QTL analysis*

112 A doubled haploid (DH) population of 177 lines from a cross between varieties Yerong and  
113 Franklin was used in this study. Seeds for each genotype were obtained from the University  
114 of Tasmania. Franklin is an Australian two-rowed malting quality variety, and Yerong is an  
115 Australian six-rowed feed quality variety. The genetic linkage map of the population  
116 comprised 28 microsatellites and 196 diversity arrays technology (DArT) markers assembled  
117 by Li and Zhou <sup>23</sup>.

118 *Evaluation of seedling resistance to scald*

119 Four different *R. commune* isolates, WAI2466, WAI2470, WAI2471 and WAI2473, were  
120 used in the seedling resistance screening in the glasshouse experiments (Table 1). All four  
121 isolates were collected from southern New South Wales and are held in the Wagga Wagga  
122 Agricultural Institute fungal isolate collection (Table 1). Inoculum preparation and  
123 inoculations were as outlined for the differential screening. Spores were diluted to  $1 \times 10^6$   
124 spores ml<sup>-1</sup> in distilled water using a haemocytometer. Each of the four isolates was tested in  
125 a separate experiment. For each experiment, the 177 DH lines as well as the parental varieties  
126 Franklin and Yerong and an additional 21 check varieties (for a total of 200 genotypes) were  
127 sown in 6-cm pots arrayed in a 24 column by 25 row randomized complete block design with  
128 three replicates of each genotype for a total of 600 pots. Each variety by isolate combination  
129 was tested with three different experiments with three technical replicates per experiment.  
130 Seedlings were scored 14 days post-inoculation with a scoring system from 1 to 4 (1 =  
131 resistant and 4 = very susceptible) following the methods of Wallwork and Grcic <sup>7</sup>.

132 *Field screening*

133 Field screening for scald resistance was conducted at Wagga Wagga Agricultural Institute  
134 (Wagga Wagga, New South Wales) in 2015, 2016 and 2017. All field trials were sown in  
135 May with a randomised complete block design with two replicates for each genotype. Each  
136 genotype was sown in 1.2 m rows with 0.4 m spacing between each row. The primary  
137 inoculum for *R. commune* infection was residual barley crop debris from the previous  
138 harvest. Overhead irrigation was used regularly to supplement rainfall throughout the  
139 growing season to enhance the development of disease. Experiments were subject to a strict  
140 weed control and crop nutrition regime to maximize yield potential. Assessment of disease  
141 was based on leaf symptoms using the percentage of infected leaf area<sup>6</sup>. Relative maturity at  
142 the time of disease assessment was determined using the Zadoks decimal score for plant  
143 development<sup>25</sup>. Final plant height was also measured at physiological maturity in the 2017  
144 experiment.

145 *Statistical analysis*

146 All data was analysed using the software package ASReml-R version 3<sup>26</sup> in the R  
147 environment<sup>27</sup>. A linear mixed model following the approach of Gilmour, et al.<sup>28</sup> was used  
148 to analyse the data for the differential variety screening experiments as follows (Model 1):

$$y = X\tau + Zg + Zu + e$$

149 where  $y$  is the  $n \times 1$  vector of the response variable (scald score) across  $p = 22$  experiments  
150 with each of the 11 *R. commune* isolates tested in a separate experiment, and that experiment  
151 repeated once.  $n = 2640$  for the differential variety screening experiments as only selected  
152 varieties were included.  $\tau$  is a  $t \times 1$  vector of fixed effects, including the overall mean scald  
153 score, corresponding to the  $n \times t$  design matrix  $X$ . The term  $g$  is the vector of genotypic

154 random effects with associated design matrix  $\mathbf{Z}$  used to model the genotype by experiment  
155 effects. The term  $\mathbf{u}$  is the vector of random effects corresponding to the experimental design  
156 matrix  $\mathbf{Z}$ , which contains experiment-specific terms to capture extraneous variation including  
157 the experiment level blocking structure including replicate, row and column. The  $n \times 1$   
158 residual vector  $\mathbf{e}$  was modelled for each experiment.

159 A model similar to Model 1 above was also used to model scald scores for the seedling  
160 inoculation experiments with  $n = 7200$  for the  $p = 12$  experiments conducted.

161 For the field screening experiments measuring scald resistance and relative maturity, each of  
162 the three field experiments was modelled separately using a bivariate approach as follows:

$$\mathbf{y} = \mathbf{X}\boldsymbol{\tau} + \mathbf{Z}\mathbf{u} + \mathbf{e}$$

163 where  $\mathbf{y}$  is a vector of length  $n = 2 \times 479$  containing stacked vectors for the two traits,  $S$ :  
164 scald resistance and  $R$ : relative maturity).  $\boldsymbol{\tau}$  is a vector of fixed effects including trait means  
165 and the trait by genotype effects for the design matrix  $\mathbf{X}$ . The term  $\mathbf{u}$  is the vector of replicate,  
166 column and row effects for each trait corresponding to the experimental design structure  $\mathbf{Z}$ .  
167 The vector  $\mathbf{e}$  of length  $n$  containing the residuals of the two traits  $S$  and  $R$  was modelled with  
168 a separable autoregressive process of order one ( $AR1 \otimes AR1$ ) and an unstructured variance-  
169 covariance matrix between traits. This structure permits the fitting of a linear relationship at  
170 the residual level between the two traits. In all models, the significance of fixed effects was  
171 assessed using the techniques of Kenward and Roger <sup>29</sup> and the significance of random  
172 effects other than ‘replicate’ was determined using log-likelihood ratio tests <sup>30</sup>.



173 The linear relationship between scald resistance and relative maturity was determined from  
174 the trait:genotype covariance modelling after the general approach of Van Beuningen and  
175 Kohli<sup>31</sup> and the paired case-control study example detailed in Butler, et al.<sup>26</sup> as follows:

$$e_S = \beta_1 e_R + \beta_0$$

176 where the slope of the regression is calculated as:

$$\beta_1 = \frac{\sigma_{SR}}{\sigma^2_S}$$

177 and the intercept  $\beta_0$  was determined from the overall BLUPs for the two traits  $S$  and  $R$  from  
178 the bivariate mixed model. The difference (residual) between the BLUP from the mixed  
179 model for scald resistance of a genotype and the predicted value on the trend line was  
180 calculated. These values are referred to hereafter as the deviation from the regression of scald  
181 resistance on relative maturity (DRSRRM).

### 182 *QTL analysis and positioning of identified QTL on the barley physical map*

183 The DRSRRM values for each individual field experiment were used as the phenotype to  
184 detect QTL for scald resistance adjusted for the relationship between scald resistance and  
185 relative maturity. For the phenotype analyses of scald percentage, relative maturity and plant  
186 height BLUPs were obtained from the model for each experiment. Phenotypes were used for  
187 QTL analysis using the MapQTL6.0 software package<sup>32</sup>. QTLs were first analysed with  
188 interval mapping (IM). The closest marker to each QTL was selected as a cofactor for  
189 multiple QTL mapping (MQM). A logarithm of the odds (LOD) threshold value of 3 was  
190 used to identify QTL.

191 The primer sequences of markers associated with the identified QTL for scald resistance and  
192 fine mapped *Rrs1*<sup>12</sup> were used to do BLAST searches by using the IPK Barley BLAST  
193 Server (<http://webblast.ipk-gatersleben.de/barley>). The barley pseudomolecules Morex V 2.0  
194 2019, was used for the BLASTn search. Default settings were used to do the BLASTn search  
195 and the best hit was used to decide the physical position of the detected QTL.

## 196 **Results**

### 197 *Differential varieties screening*

198 Atlas46 (*Rrs1* + *Rrs2*) was resistant to all the isolates used in this study, with scores under  
199 2.3, except isolate WAI2840, which was virulent on all varieties with a score of more than  
200 3.5 (Table 2). Turk (*Rrs1*) was resistant to all the isolates used in this study with scores under  
201 2.4, except two isolates WAI2439 and WAI2840. Varieties carrying *Rrs2* (Atlas and Atlas46)  
202 were resistant against isolate WAI2439 (Table 2). Varieties conferring *Rrs1* (Turk and  
203 Atlas46) showed higher level of resistance than Atlas and Yerong against two isolates,  
204 WAI1245 and WAI2464. Varieties carrying either *Rrs1* or *Rrs2* were resistant against  
205 isolates WAI453, WAI2466, WAI2471 and WAI2636.

206 Turk was significantly more resistant than Yerong against five isolates and equivalent against  
207 the remaining six isolates tested. Together, these results suggested that *Rrs1* from Turk was  
208 not present in Yerong. Compared to Yerong, Atlas showed a higher level of resistance against  
209 isolates WAI2439, WAI2463, WAI2466, WAI2470 and WAI2636, suggesting *Rrs2* is absent  
210 in Yerong. Yerong was resistant against WAI2471, and displayed moderate resistance against  
211 isolates WAI453, WAI1245, WAI2439 and WAI2473 with the scores between 3.0 and 3.4.  
212 Yerong showed a better resistance than Franklin against isolates WAI453, WAI1245 and

213 WAI2471 with the overall scores of Yerong being lower than those of Franklin. Litmus was  
214 susceptible to all the isolates in this study.

#### 215 *QTLs for scald resistance at the seedling stage*

216 There were no significant differences (using 95% confidence intervals) in resistance to the  
217 four isolates WAI2466, WAI2470, WAI2471 and WAI2473 among the two parent cultivars  
218 in the seedling stage screening experiments. However, there was phenotypic variation in  
219 resistance to the different isolates among the DH population lines (Fig. 1). The disease scores  
220 among DH population lines against WAI2466 showed a bimodal distribution of scores  
221 between resistant and susceptible lines. The variation of disease scores against WAI2470 was  
222 the lowest among all four isolates. The distribution of disease scores against WAI2471 was  
223 skewed towards higher levels of disease. In contrast, the distribution of disease scores against  
224 WAI2473 was skewed towards the lower end of the scoring scale.

225 One major QTL on chromosome 3H, designated as QTL-WAIYerong-3H, was identified for  
226 seedling resistance to all four different *R. commune* isolates (WAI2466, WAI2470, WAI2471  
227 and WAI2473) at the same position (Table 3) at 178.7 Mb. Flanking markers of this QTL,  
228 bPb-0068 and Bmag0006, are mapped at 120.3 and 178.7 Mb on the physical map (Fig. 2).  
229 The LOD scores varied from 23.8 to 38.7, explaining more than 46% of the phenotypic  
230 variation (Table 3).

#### 231 *Scald resistance under field conditions*

232 The parent varieties Franklin and Yerong showed similar levels of scald resistance and  
233 relative maturity across the different years (Table 4). There were no significant differences  
234 between Franklin and Yerong for any of the traits measured across the different years ( $p >$   
235 0.01). However, the DH lines showed substantial phenotypic variation in scald resistance and

236 relative maturity (Fig. 3). Average disease incidence was more severe in 2016, reaching  
237 43.0%, higher than the average scald percentages in 2015 (29.0%) and 2017 (22.1%) (Table  
238 4).

239 A significant correlation (Pearson's correlation coefficient) between scald percentage and  
240 relative maturity was observed among the DH lines (Fig. 3) in 2015 ( $r = 0.50$ ,  $p < 0.01$ ), 2016  
241 ( $r = 0.51$ ,  $p < 0.01$ ). Later flowering lines (with lower relative maturity scores) tended to have  
242 a lower scald percentage. In 2017, although Pearson correlation coefficient between relative  
243 maturity and scald percentage was significant ( $r = 0.34$ ,  $P < 0.01$ ), no correlation was  
244 indicated between relative maturity and scald percentage from bivariate analysis (Fig. 3). A  
245 phenotype value was calculated to account for the linear relationship between scald  
246 percentage and relative maturity by determining the deviation from the regression of scald  
247 percentage on relative maturity (DRSRRM) and this was used as a phenotype for QTL  
248 analysis in our field trials.

#### 249 *QTLs for relative maturity and plant height*

250 Four QTLs for relative maturity were identified in the Yerong/Franklin population  
251 consistently across all three years (Fig. 4 and Table 3): two on chromosome 2H, one on  
252 chromosome 5H and another one on chromosome 7H. These four QTLs explained more than  
253 40% of the total phenotypic variance for relative maturity. One QTL for plant height in 2017  
254 was identified on chromosome 3H that explained 14.1% of the total phenotypic variance,  
255 with a LOD value of 5.7 (Table 3).

#### 256 *QTL for scald resistance in the field*

257 In 2015, one QTL for scald percentage on chromosome 2H (QTLSP-2H-2015) was located at  
258 the same position as the 2H QTL for relative maturity (QTLZ-2H-2015). In 2016, QTLSP-

259 2H-2016 and QTLZ-2H-2016 were also mapped at the same position on chromosome 2H  
260 (Fig. 4 and Table 3). Markers associated with QTLSP-7H-2016 and QTLZ-7H-2016 were  
261 also located close to each other (Fig. 4 and Table 3). QTLs for scald percentage were not  
262 mapped at the same position as QTLs for relative maturity in 2017.

263 The QTLs for DRSRRM in 2016 (QTLSR-3H-2016) and 2017 (QTLSR-3H-2017) were  
264 located at 178.7 Mb in the same position as QTL-WAIYerong-3H, and the resistant allele  
265 was also derived from the Yerong parent. The QTL for DRSRRM (QTL-WAIYerong-3H)  
266 explained 20.7% of the phenotypic variance in 2016 (LOD value 8.8; Fig. 4 and Table 3). In  
267 2015, the QTL for DRSRRM on chromosome 3H (QTLSR-3H-2015) was 15 cM away from  
268 this major QTL on the linkage map, at 503.4 Mb on the barley physical map. This QTL was  
269 still more than 50 Mb away from *Rrs1*, between *Rrs1* (448.4 Mb) and *Rrs4* (523.0 Mb) on  
270 chromosome 3H, explaining 14.8% of phenotypic variance. QTLs were identified for  
271 DRSRRM on chromosome 3H across the three years at the same location as the QTLs  
272 detected for scald percentage. In 2017, a novel QTL for scald resistance (both scald  
273 percentage and DRSRRM) was identified on chromosome 7H from Franklin, locating at 69.9  
274 Mb on the barley physical map. This QTL explained 12.9 % phenotypic variance with a LOD  
275 value of 5.8.

## 276 **Discussion**

### 277 *Scald resistance at seedling stage*

278 Differential screening conducted in this study showed that the combination of major  
279 resistance genes *Rrs1* and *Rrs2* in the variety Atlas46 provides resistance to 10 out of 11 *R.*  
280 *commune* isolates from southern NSW. These results confirmed the effectiveness of  
281 pyramiding major resistance genes into one variety in providing broad protection against *R.*

282 *commune*<sup>7,33</sup>. However, resistance gene combinations need to be found that do not rapidly  
283 select for the corresponding virulence gene combinations in the pathogen population. This  
284 remains a challenge with only a limited understanding of the gene for gene interaction  
285 between *R. commune* and its host. We have identified specific *R. commune* isolates to  
286 distinguish the presence of *Rrs1* or *Rrs2*. While isolates such as WAI2840 posed a threat to  
287 reliance on just these two major genes, they are valuable in detecting seedling resistances  
288 other than *Rrs1* and *Rrs2* for use in resistance breeding.

289 Five of the *R. commune* isolates screened in this study were avirulent against Turk and  
290 virulent against Yerong, indicating that the *Rrs1* allele from Turk is not present in Yerong.  
291 Yerong was resistant to isolate WAI2471, and had moderate levels of resistance against  
292 WAI453, WAI1245, WAI2439 and WAI2473. Further QTL analysis located a major QTL for  
293 scald resistance against four different isolates at the seedling stage to chromosome 3H, which  
294 originated from Yerong. This QTL-WAIYerong-3H explained more than 46% of the  
295 phenotypic variation and is located at the same position of a QTL (QSc.YeFr-3H) identified  
296 using adult plant data in a previous study from the same DH population in Tasmania,  
297 Australia<sup>23</sup>. However, Li and Zhou (2011) were unable to distinguish this QTL from Yerong  
298 from that of *Rrs1*.

299 The complete reference barley genome sequence enabled the projection of QTLs from  
300 different populations onto one barley physical map<sup>34</sup>. In our study, flanking markers of the  
301 QTL-WAIYerong-3H, bPb-0068 and Bmag0006, are mapped at 120.3 and 178.7 Mb on the  
302 physical map. The position is some distance away from previously fine mapped *Rrs1* which  
303 is located at a position of 448.4 Mb on chromosome 3H (Fig. 2)<sup>12</sup>. This also suggested the  
304 scald resistance QTL-WAIYerong-3H is different from *Rrs1*. Multiple major and minor scald  
305 resistance genes or QTLs have been identified on chromosome 3H, close to the *Rrs1* locus

306 <sup>12,16-20</sup>. Among these QTL, the QTL-IA3H from cultivar Abyssinian was identified in studies  
307 of seedling resistance to four *R. commune* isolates <sup>19</sup>. A QTL Rrs1BC240 for *R. commune*  
308 resistance from wild barley *H. spontaneum* was also identified at the position of *Rrs1* <sup>17</sup>.  
309 While ICARDA4 and ICARDA9 showed resistance to all isolates at seedling stage in one  
310 study <sup>7</sup> and QTLs identified from them were mapped at 383.9 Mb on physical map <sup>17</sup>, the  
311 identity of these resistances remain unknown.

312 A scald resistance QTL in a similar position to the QTL-WAIYerong-3H (Fig. 2) was  
313 published by Coulter, et al. <sup>20</sup>. QTL qSUK7\_3, contributed by the variety Steptoe based on  
314 detached leaf assays, was located 3 Mb away from QTL-WAIYerong-3H. The authors  
315 suggested this resistance to be different from *Rrs1* based on differential isolate reactions, but  
316 were unable to differentiate its map position from that of *Rrs1* <sup>20</sup>. Further experiments are  
317 required to resolve whether the QTL-WAIYerong-3H is the same or different to the gene  
318 found in Steptoe on chromosome 3H.

### 319 *Disease escape under field conditions*

320 Our study illustrates the potentially confounding effects that relative maturity can have when  
321 phenotyping for disease resistance. The observed differences between genotypes may be  
322 conferred by both host resistance and mechanisms that lead to disease escape, such as plant  
323 maturity, plant height and canopy structure <sup>8,15</sup>. For example, Zhan, et al. <sup>8</sup> postulated that  
324 later flowering time and taller plant height can physically slow the upward spread of splash-  
325 dispersed *R. commune* and contribute to disease escape. While disease escape traits are  
326 important, we sought to identify sources of resistance that are independent of relative  
327 maturity, as these QTL are more likely to be useful in breeding programs selecting for a  
328 constrained window of flowering time for their target environments.

329 In this study the positions of all four QTLs for relative maturity were co-located with known  
330 phenology QTLs. QTLZ-2H.1 was co-located with a QTL for heading date detected in a  
331 TX9425/Franklin population <sup>35</sup> and this relative maturity allele was derived from Franklin.  
332 This QTL is close to another flowering-time QTL, pseudo-response regulator *Ppd-H1* <sup>36</sup>,  
333 which is located 7 cM away on the consensus map. QTLZ-2H.2 was located at the same  
334 position as another QTL for heading date detected by Nduulu, et al. <sup>37</sup>. QTLZ-5H and QTLZ-  
335 7H were located at the same positions as the flowering time genes *eam5* and *Eps-7S*,  
336 respectively <sup>38</sup>.

337 All of these loci have also been implicated to be associated with resistance at seedling or  
338 adult plant stages to five biotrophic or necrotrophic pathogens. von Korff, et al. <sup>39</sup> identified  
339 QTLs for scald, leaf rust and powdery mildew resistance at a position similar to that of *Ppd*-  
340 *H1*. QTLZ-2H.2 was located at the same position as a QTL for Fusarium head blight  
341 resistance detected by Nduulu, et al. <sup>37</sup>. The results of Nduulu, et al. <sup>37</sup> also indicated that the  
342 QTLs for heading date and Fusarium head blight resistance were tightly linked rather than  
343 pleiotropic. A new gene conferring adult plant resistance to leaf rust, *Rph23*, was identified  
344 in the same Yerong/Franklin population used in this study on chromosome 7H, co-located  
345 with the QTL QTLZ-7H detected in this study <sup>40</sup>. Another QTL for stem rust resistance at the  
346 seedling stage was also mapped to the same position as QTLZ-7H from Yerong/Franklin  
347 population <sup>41</sup>.

348 A QTL for plant height was mapped to chromosome 2H at the same position as QTLZ-2H.2  
349 in the Yerong/Franklin population by Xue, et al. <sup>42</sup>. Interestingly, the QTL for plant height  
350 identified in the Yerong/Franklin population is at the same position as a QTL for plant height  
351 in a CM72/Gairdner population <sup>43</sup>. Mature plant height was measured in only one of the  
352 experiments in this study (in 2017), and a correlation between mature plant height and scald



353 resistance was not observed (data not shown), and the QTL identified for plant height did not  
354 co-locate with scald resistance QTL (Table 3).

355 *Modelling relative maturity together with disease resistance*

356 The deviation from the regression of infection on important confounding traits has been  
357 employed previously as an effective phenotype for disease resistance<sup>9,31</sup>. Van Beuningen and  
358 Kohli<sup>31</sup> in particular included linear functions for both heading date and plant height against  
359 *Septoria tritici blotch* (STB) infection in wheat. They aimed to calculate a phenotype that  
360 captured components of resistance that did not depend on those two traits, and represented a  
361 better approximation of genetic resistance from the experiments in their study. The residuals  
362 from a generalized linear model in which STB percentages were fitted to all escape related  
363 traits, including heading date, plant height, leaf spacing and leaf morphology, were used as  
364 the indicators of disease resistance to analyse the STB resistance in a set of wheat lines<sup>44</sup>.  
365 Chartrain, et al.<sup>45</sup> identified a QTL for partial resistance to STB in wheat by using residuals  
366 from multiple regression on relative maturity and plant height as their phenotype. QTLs for  
367 spot blotch resistance in wheat were detected by using residuals when fitting disease severity  
368 as a dependent variable and plant height and days to heading as independent variables in  
369 multiple regression to exclude the effects of these traits<sup>46</sup>. Most of the reported uses of  
370 maturity regression residuals phenotype pertain to STB resistance in wheat. This could be due  
371 to the well-characterised relationship between STB infection rates and both flowering time  
372 and plant height<sup>47</sup> and recognition that these confounding traits needed to be accounted for in  
373 ascertaining true genetic resistance for STB that would be useful for variety improvement<sup>48</sup>.  
374 In general terms, for phenotypes based on deviation from the regression of a correlated trait  
375 (like our DRSRRM measure of resistance) and the approaches described above, the most  
376 resistant lines are those with the largest negative values of residuals, also allowing breeders to

377 select resistant lines with desirable relative maturity and plant height <sup>44,49</sup>. Further, as noted  
378 by Van Beuningen and Kohli <sup>31</sup>, this approach is especially useful where disease resistance is  
379 evaluated in experiments at a single date, rather than at critical development stages for each  
380 line, especially in genetic material with large variation for confounding traits such as  
381 maturity.

382 In our study, a multiplicative mixed model was used to analyse the field data of scald  
383 resistance and relative maturity. A QTL for scald percentage on chromosome 2H were  
384 identified at the same position as QTLs for relative maturity; and the major QTL on  
385 chromosome 3H was also detected for scald percentage. When DRSRRM was utilised as a  
386 trait for QTL analysis, a major QTL was identified on chromosome 3H. This major QTL is  
387 co-located with a major QTL detected for scald resistance at seedling stage QTL-  
388 WAIYerong-3H. This indicates that by using DRSRRM, QTLs for disease resistance were  
389 identified as the confounding effects of relative maturity were removed.

390 In conclusion, a major QTL QTL-WAIYerong-3H providing scald resistance at both seedling  
391 and adult plant growth stages was identified. Results from this study indicate that this QTL-  
392 WAIYerong-3H is not *RrsI*, as differential variety screening indicates the *RrsI* allele from  
393 Turk is not present in Yerong. The flanking markers for this QTL-WAIYerong-3H are  
394 located distantly (approx. 270Mb) from the *RrsI* locus based on the barley physical map. To  
395 overcome the confounding effects of relative maturity on adult plant disease resistance, a  
396 bivariate approach was used to model the field data of scald resistance and relative maturity.  
397 The phenotype derived from the bivariate analysis (DRSRRM) is a more effective trait to  
398 detect disease resistance QTLs as it removes the confounding effects of relative maturity. The  
399 identified new QTL identified in this study are a useful resource for pyramiding different  
400 resistance genes (major or minor) in breeding programs.

401

402 **Table 1** Origin of isolates of scald from the Wagga Wagga Agricultural Institute fungal  
403 isolate collection used for screening

| Isolate | Host variety | Location         | Collection date |
|---------|--------------|------------------|-----------------|
| WAI453  | Franklin     | Wagga Wagga, NSW | 2013            |
| WAI1245 | Franklin     | Wagga Wagga, NSW | 2013            |
| WAI2439 | Unknown      | Downside, NSW    | 2015            |
| WAI2463 | Buloke       | Bogan Gate, NSW  | 2015            |
| WAI2464 | Buloke       | Bogan Gate, NSW  | 2015            |
| WAI2466 | Buloke       | Bogan Gate, NSW  | 2015            |
| WAI2470 | Unknown      | Mirrool, NSW     | 2015            |
| WAI2471 | Unknown      | Mirrool, NSW     | 2015            |
| WAI2473 | Unknown      | Mirrool, NSW     | 2015            |
| WAI2636 | Buloke       | Bogan Gate, NSW  | 2015            |
| WAI2840 | Unknown      | Finley, NSW      | 2016            |

404

405

406

407 **Table 2** Predicted values (BLUPs) with 95% confidence intervals for seedling resistance of different barley varieties against 11 different *R.*

408 *commune* isolates

409

| Variety  | Resistance       | WAI453    | WAI1245   | WAI2439   | WAI2463   | WAI2464   | WAI2466   | WAI2470   | WAI2471   | WAI2473   | WAI2636   | WAI2840   |
|----------|------------------|-----------|-----------|-----------|-----------|-----------|-----------|-----------|-----------|-----------|-----------|-----------|
| Atlas    | <i>Rrs2</i>      | 2.4 ± 0.8 | 3.3 ± 0.9 | 2.3 ± 0.8 | 3.1 ± 0.8 | 4.0 ± 0.9 | 2.4 ± 0.6 | 2.8 ± 0.8 | 2.2 ± 0.8 | 2.9 ± 1.2 | 2.5 ± 0.5 | 3.5 ± 0.9 |
| Atlas46  | <i>Rrs1+Rrs2</i> | 2.1 ± 0.8 | 2.0 ± 0.8 | 2.3 ± 0.8 | 2.2 ± 0.8 | 2.1 ± 0.9 | 1.9 ± 0.6 | 2.1 ± 0.9 | 2.0 ± 0.8 | 2.0 ± 0.8 | 1.8 ± 0.5 | 3.5 ± 0.8 |
| Franklin |                  | 4.2 ± 0.8 | 4.3 ± 0.8 | 3.5 ± 0.8 | 4.4 ± 0.8 | 4.4 ± 0.8 | 4.7 ± 0.5 | 4.4 ± 0.8 | 3.4 ± 1.3 | 3.6 ± 0.8 | 4.3 ± 0.5 | 4.4 ± 0.8 |
| Litmus   | Susceptible      | 4.5 ± 0.8 | 4.4 ± 0.8 | 4.4 ± 0.9 | 4.5 ± 0.8 | 4.5 ± 0.8 | 5.2 ± 0.5 | 4.4 ± 0.8 | 4.0 ± 0.8 | 4.3 ± 0.8 | 4.1 ± 0.5 | 3.9 ± 1.2 |
| Turk     | <i>Rrs1</i>      | 2.0 ± 0.8 | 2.2 ± 0.8 | 3.8 ± 0.8 | 2.4 ± 0.8 | 2.0 ± 0.8 | 1.7 ± 0.5 | 2.0 ± 0.8 | 2.0 ± 0.8 | 2.0 ± 0.8 | 1.7 ± 0.5 | 4.1 ± 0.8 |
| Yerong   |                  | 3.1 ± 0.8 | 3.4 ± 0.8 | 3.2 ± 0.8 | 4.3 ± 0.8 | 4.3 ± 0.8 | 4.7 ± 0.5 | 4.3 ± 0.8 | 2.3 ± 0.8 | 3.2 ± 0.8 | 3.8 ± 0.5 | 4.3 ± 0.8 |

410

411 **Table 3** Summary of QTLs for scald resistance at the seedling stage to four different isolates: WAI2466, WAI2470, WAI2471 and WAI2473,  
 412 and Summary of the QTLs for all traits measured in the field experiments

| Trait             | QTL name         | Year | Chromosome | Linkage map position | Closest marker | LOD  | R <sup>2</sup> | Additive effect |
|-------------------|------------------|------|------------|----------------------|----------------|------|----------------|-----------------|
| WAI2466-seedling  | QTL-WAIYerong-3H |      | 3H         | 54.1                 | Bmag0006       | 38.7 | 63.5           | -0.43           |
| WAI2470-seedling  | QTL-WAIYerong-3H |      | 3H         | 54.1                 | Bmag0006       | 23.8 | 46.2           | -0.22           |
| WAI2471-seedling  | QTL-WAIYerong-3H |      | 3H         | 54.1                 | Bmag0006       | 32.3 | 56.8           | -0.41           |
| WAI2473-seedling  | QTL-WAIYerong-3H |      | 3H         | 54.1                 | Bmag0006       | 38.4 | 63.1           | -0.52           |
| Plant height      | QTLPH            | 2017 | 3H         | 124.1                | bPb-7335       | 5.7  | 14.1           | 3.07            |
| Relative maturity | QTLZ-2H.1-2015   | 2015 | 2H         | 31.3                 | bPb-4523       | 11.5 | 19.0           | 3.03            |
|                   | QTLZ-7H-2015     |      | 7H         | 41.7                 | bPb-9601       | 8.2  | 12.9           | -2.42           |
|                   | QTLZ-2H.2-2015   |      | 2H         | 73.1                 | Bmac0093       | 7.6  | 11.7           | 2.43            |
|                   | QTLZ-5H-2015     |      | 5H         | 65.1                 | bPb-7015       | 6.4  | 9.7            | 2.04            |
|                   | QTLZ-2H.1-2016   | 2016 | 2H         | 18.1                 | bPb-3186       | 10.4 | 15.0           | 2.15            |
|                   | QTLZ-7H-2016     |      | 7H         | 41.7                 | bPb-9601       | 9.9  | 14.1           | -2.11           |
|                   | QTLZ-5H-2016     |      | 5H         | 58.9                 | bPb-9476       | 8.0  | 11.2           | 1.88            |
|                   | QTLZ-2H.2-2016   |      | 2H         | 73.1                 | Bmac0093       | 4.0  | 5.3            | 1.31            |
|                   | QTLZ-2H.1-2017   | 2017 | 2H         | 31.3                 | bPb-4523       | 8.6  | 14.3           | 2.19            |
|                   | QTLZ-7H-2017     |      | 7H         | 41.7                 | bPb-9601       | 8.1  | 13.5           | -2.04           |
|                   | QTLZ-2H.2-2017   |      | 2H         | 71.6                 | bPb-6881       | 5.2  | 8.3            | 1.75            |
|                   | QTLZ-5H-2017     |      | 5H         | 65.1                 | bPb-7015       | 5.1  | 8.1            | 1.57            |
| Scald percentage  | QTLSP-3H-2015    | 2015 | 3H         | 69.6                 | bPb-7872       | 4.3  | 11.1           | -4.80           |
|                   | QTLSP-2H-2015    |      | 2H         | 31.3                 | bPb-4523       | 3.9  | 10.2           | 4.47            |
|                   | QTLSP-3H-2016    | 2016 | 3H         | 54.1                 | Bmag0006       | 10.8 | 17.8           | -4.18           |

|        |               |      |    |       |          |     |      |       |
|--------|---------------|------|----|-------|----------|-----|------|-------|
|        | QTLSP-6H-2016 |      | 6H | 142.3 | bPb-3780 | 5.2 | 7.9  | 2.80  |
|        | QTLSP-2H-2016 |      | 2H | 31.3  | bPb-4523 | 5.2 | 7.9  | 2.76  |
|        | QTLSP-7H-2016 |      | 7H | 53.0  | bPb-5091 | 4.9 | 7.4  | -2.68 |
|        | QTLSP-5H-2016 |      | 5H | 124.8 | bPb-0171 | 3.3 | 4.9  | 2.15  |
|        | QTLSP-7H-2017 | 2017 | 7H | 68.5  | bPb-4541 | 5.9 | 13.0 | -4.53 |
|        | QTLSP-3H-2017 |      | 3H | 54.1  | Bmag0006 | 4.4 | 9.6  | -3.87 |
| DRSRRM | QTLSP-3H-2015 | 2015 | 3H | 69.6  | bPb-7872 | 5.1 | 14.8 | -4.83 |
|        | QTLSP-3H-2016 | 2016 | 3H | 54.1  | Bmag0006 | 8.8 | 20.7 | -3.76 |
|        | QTLSP-7H-2017 | 2017 | 7H | 68.5  | bPb-4541 | 5.8 | 12.9 | -4.49 |
|        | QTLSP-3H-2017 |      | 3H | 54.1  | Bmag0006 | 4.4 | 9.7  | -3.86 |

413

414 **Table 4** Phenotypic predicted values (BLUPs) of traits measured in the Yerong/Franklin  
415 population under field conditions

| Trait             | Year | Average | Max   | Min   | Franklin | Yerong |
|-------------------|------|---------|-------|-------|----------|--------|
| Relative maturity | 2015 | 42.1    | 58.4  | 33.3  | 38.2     | 38.3   |
|                   | 2016 | 47.0    | 59.5  | 37.0  | 42.8     | 45.9   |
|                   | 2017 | 45.2    | 61.0  | 35.5  | 43.0     | 41.5   |
| Scald percentage  | 2015 | 29.0    | 63.4  | -0.3  | 23.7     | 21.7   |
|                   | 2016 | 43.0    | 63.5  | 15.1  | 31.6     | 34.3   |
|                   | 2017 | 22.1    | 61.5  | 6.5   | 16.0     | 18.5   |
| DRSRRM            | 2015 | -0.1    | 34.8  | -26.4 | -2.2     | -4.3   |
|                   | 2016 | -0.2    | 19.7  | -18.6 | -7.6     | -7.8   |
|                   | 2017 | -0.1    | 39.3  | -15.6 | -6.1     | -3.6   |
| Plant height      | 2017 | 96.3    | 115.5 | 72.0  | 107.0    | 106.0  |



416 **Figure Captions**

417 **Fig. 1** Frequency distribution of scald resistance to four pathogen isolates in the  
418 Yerong/Franklin population at the seedling stage different isolates. The positions of text  
419 labels “Yerong” and “Franklin” in the figure are based on the disease score of each parent at  
420 the seedling stage

421 **Fig. 2** Positions of marker sequences on 3H pseudomolecule (100 - 600 Mb) of Morex  
422 genome assemble version 4. Flanking markers of the major QTL on chromosome 3H from  
423 Yerong identified in this study (bPb-0068 and Bmag0006) mapped at 120.3 and 178.7 Mb on  
424 the physical map. Flanking markers of QTLSR-3H-2015, bPb-7872 and bPb-8410 mapped at  
425 486.2 and 503.4 Mb on the physical map. The physical position of fine mapped *Rrs1* is  
426 identified using flanking markers, at 448.4 Mb<sup>12</sup>. The original RFLP marker mwg680, which  
427 is closely linked to the *Rrs1* gene, is located at 455.3 Mb<sup>50</sup>. The resistance QTLs from  
428 ICARDA4 and ICARDA9 are mapped at 383.9 Mb based on marker Xbmag603<sup>17</sup>. The  
429 resistance QTL Rrs1BC240 from wild barley *H. spontaneum* CPI 109853 is mapped at 455.3  
430 Mb<sup>17</sup>. The locations of resistance QTLs identified from Steptoe (qSUK7\_3) and Clho 3515  
431 (qC147\_3) are cited from Coulter, et al.<sup>20</sup>. The resistance QTL QTL-IA3H from Abyssinian  
432 is mapped at 455.3 Mb against four isolates<sup>19</sup>. Major resistance gene *Rrs4* is mapped at 523.0  
433 Mb based on marker HVM60<sup>51</sup>

434 **Fig. 3** The scald percentage in the DH population of Yerong/Franklin plotted against Zadoks  
435 score

436 **Fig. 4** LOD values of QTLs detected for Zadoks score, scald percentage and DRSRRM by  
437 MQM mapping across three years field experiments in DH population of Yerong/Franklin.  
438 The LOD values of each marker were plotted against the chromosomes

439

440 **Acknowledgements**

441 The authors thank Tony Goldthorpe, Michael McCaig and Brad Baxter for their expert  
442 technical contributions and data collection.

443 **Author contributions**

444 AM conceived and designed the experiments. MZ, RP and DS provided seeds of the Yerong-  
445 Franklin population. XZ performed the phenotype screening. BO, XZ, BAO and AM  
446 analysed the data. XZ, BO, BAO, MZ, RP, DS and AM prepared and edited the manuscript.

447 **Funding**

448 This work was financially supported by the Grains Research and Development Corporation  
449 (GRDC) of Australia under project DAQ00187.

450 **Compliance with ethical standards Disclaimer**

451 **Conflict of interest**

452 The authors declare that they have no conflict of interest.

453 **Ethical approval**

454 This article does not contain any studies with human participants or animals performed by the  
455 authors.

456 **References**

- 457 1 Paulitz, T. & Steffenson, B. J. in *Barley: production, improvement and uses* (ed S. E.  
458 Ullrich) 307-354 (Blackwell Publishing Ltd, 2011).
- 459 2 Stefansson, T. S., Serenius, M. & Hallsson, J. H. The genetic diversity of Icelandic  
460 populations of two barley leaf pathogens, *Rhynchosporium commune* and  
461 *Pyrenophora teres*. *European Journal of Plant Pathology* **134**, 167-180,  
462 doi:10.1007/s10658-012-9974-8 (2012).
- 463 3 Bouajila, A., Zoghalmi, N., Ghorbel, A., Rezgui, S. & Yahyaoui, A. Pathotype and  
464 microsatellite analyses reveal new sources of resistance to barley scald in Tunisia.  
465 *Fems Microbiol Lett* **305**, 35-41, doi:10.1111/j.1574-6968.2010.01909.x (2010).
- 466 4 Goodwin, S. B., Allard, R. W., Hardy, S. A. & Webster, R. K. Hierarchical Structure  
467 of Pathogenic Variation among *Rhynchosporium-Secalis* Populations in Idaho and  
468 Oregon. *Can J Bot* **70**, 810-817 (1992).
- 469 5 Stefansson, T. S., McDonald, B. A. & Willi, Y. The Influence of Genetic Drift and  
470 Selection on Quantitative Traits in a Plant Pathogenic Fungus. *Plos One* **9**,  
471 doi:10.1371/journal.pone.0112523 (2014).
- 472 6 Xi, K. *et al.* Distribution of pathotypes of *Rhynchosporium secalis* and cultivar  
473 reaction on barley in Alberta. *Plant Dis* **87**, 391-396, doi:10.1094/Pdis.2003.87.4.391  
474 (2003).
- 475 7 Wallwork, H. & Grcic, M. The use of differential isolates of *Rhynchosporium secalis*  
476 to identify resistance to leaf scald in barley. *Australasian Plant Pathol.* **40**, 490-496,  
477 doi:10.1007/s13313-011-0065-7 (2011).
- 478 8 Zhan, J., Fitt, B. D. L., Pinnschmidt, H. O., Oxley, S. J. P. & Newton, A. C.  
479 Resistance, epidemiology and sustainable management of *Rhynchosporium secalis*  
480 populations on barley. *Plant Pathol* **57**, 1-14, doi:10.1111/j.1365-3059.2007.01691.x  
481 (2008).
- 482 9 Brown, J. K. M. Yield penalties of disease resistance in crops. *Current Opinion in*  
483 *Plant Biology* **5**, 339-344, doi:[https://doi.org/10.1016/S1369-5266\(02\)00270-4](https://doi.org/10.1016/S1369-5266(02)00270-4)  
484 (2002).
- 485 10 Xi, K., Xue, A. G., Burnett, P. A. & Turkington, T. K. Quantitative resistance of  
486 barley cultivars to *Rhynchosporium secalis*. *Canadian Journal of Plant Pathology* **22**,  
487 217-223, doi:10.1080/07060660009500466 (2000).
- 488 11 Looseley, M. E. *et al.* Resistance to *Rhynchosporium commune* in a collection of  
489 European spring barley germplasm. *Theoretical and Applied Genetics* **131**, 2513-  
490 2528, doi:10.1007/s00122-018-3168-5 (2018).
- 491 12 Hofmann, K. *et al.* Fine mapping of the *Rrs1* resistance locus against scald in two  
492 large populations derived from Spanish barley landraces. *Theoretical and Applied*  
493 *Genetics* **126**, 3091-3102, doi:10.1007/s00122-013-2196-4 (2013).
- 494 13 Hanemann, A., Schweizer, G. F., Cossu, R., Wicker, T. & Roder, M. S. Fine mapping,  
495 physical mapping and development of diagnostic markers for the *Rrs2* scald  
496 resistance gene in barley. *Theoretical and Applied Genetics* **119**, 1507-1522,  
497 doi:10.1007/s00122-009-1152-9 (2009).
- 498 14 Garvin, D. F., Brown, A. H. D. & Burdon, J. J. Inheritance and chromosome locations  
499 of scald-resistance genes derived from Iranian and Turkish wild barleys. *Theoretical*  
500 *and Applied Genetics* **94**, 1086-1091, doi:10.1007/s001220050519 (1997).
- 501 15 Walters, D. R. *et al.* Control of foliar diseases in barley: towards an integrated  
502 approach. *European Journal of Plant Pathology* **133**, 33-73,  
503 doi:<http://dx.doi.org/10.1007/s10658-012-9948-x> (2012).
- 504 16 Bjornstad, A., Patil, V., Tekauz, A., Maroy, A. G. & *et al.* Resistance to scald  
505 (*Rhynchosporium secalis*) in barley (*Hordeum vulgare*) studied by near-isogenic  
506 lines: I. markers and differential isolates. *Phytopathology* **92**, 710 (2002).

- 507 17 Genger, R. K. *et al.* Leaf scald resistance genes in *Hordeum vulgare* and *Hordeum*  
508 *vulgare* ssp *spontaneum*: parallels between cultivated and wild barley. *Aust J Agr Res*  
509 **54**, 1335-1342, doi:10.1071/ar02230 (2003).
- 510 18 Graner, A. & Tekauz, A. RFLP mapping in barley of a dominant gene conferring  
511 resistance to scald (*Rhynchosporium secalis*). *Theoretical and Applied Genetics* **93**,  
512 421-425 (1996).
- 513 19 Grønnerød, S. *et al.* Genetic analysis of resistance to barley scald (*Rhynchosporium*  
514 *secalis*) in the Ethiopian line 'Abyssinian' (CI668). *Euphytica* **126**, 235-250,  
515 doi:10.1023/a:1016368503273 (2002).
- 516 20 Coulter, M. *et al.* Characterisation of barley resistance to rhynchosporium on  
517 chromosome 6HS. *Theoretical and Applied Genetics* **132**, 1089-1107,  
518 doi:10.1007/s00122-018-3262-8 (2019).
- 519 21 Looseley, M. E. *et al.* Genetic mapping of resistance to *Rhynchosporium commune*  
520 and characterisation of early infection in a winter barley mapping population.  
521 *Euphytica* **203**, 337-347, doi:10.1007/s10681-014-1274-2 (2014).
- 522 22 Dyck, P. L. & Schaller, C. W. Inheritance of resistance in barley to several  
523 physiologic races of the scald fungus. *Canadian Journal of Genetics and Cytology* **3**,  
524 153-164, doi:10.1139/g61-019 (1961).
- 525 23 Li, H. B. & Zhou, M. X. Quantitative trait loci controlling barley powdery mildew  
526 and scald resistances in two different barley doubled haploid populations. *Molecular*  
527 *Breeding* **27**, 479-490, doi:DOI 10.1007/s11032-010-9445-x (2011).
- 528 24 Jackson, L. F. & Webster, R. K. Race differentiation, distribution, and frequency of  
529 *Rhynchosporium secalis* in California. *Phytopathology* **66**, 719-7125 (1976).
- 530 25 Zadoks, J. C., Chang, T. T. & Konzak, C. F. A decimal code for the growth stages of  
531 cereals. *Weed research* **14**, 415-421 (1974).
- 532 26 Butler, D., Cullis, B., Gilmour, A. & Gogel, B. ASReml-R reference manual.  
533 *Queensland Department of Primary Industries and Fisheries: Brisbane, Qld* (2009).
- 534 27 R: A language and environment for statistical computing (R Foundation for Statistical  
535 Computing: Vienna <http://www.R-project.org>, 2010).
- 536 28 Gilmour, A. R., Cullis, B. R. & Verbyla, A. P. Accounting for natural and extraneous  
537 variation in the analysis of field experiments. *J. Agric. Biol. Environ. Stat* **2**, 269-293  
538 (1997).
- 539 29 Kenward, M. G. & Roger, J. H. Small sample inference for fixed effects from  
540 restricted maximum likelihood. *Biometrics*, 983-997 (1997).
- 541 30 Stram, D. O. & Lee, J. W. Variance components testing in the longitudinal mixed  
542 effects model. *Biometrics*, 1171-1177 (1994).
- 543 31 Van Beuningen, L. & Kohli, M. Deviation from the regression of infection on heading  
544 and height as a measure of resistance to *Septoria tritici* blotch in wheat. *Plant Dis* **74**,  
545 488-493 (1990).
- 546 32 Van Ooijen, J. MapQTL® 6, Software for the mapping of quantitative trait in  
547 experiment populations of diploid species. *Kyazma BV, Wageningen* (2009).
- 548 33 Boyd, L. A., Ridout, C., O'Sullivan, D. M., Leach, J. E. & Leung, H. Plant-pathogen  
549 interactions: disease resistance in modern agriculture. *Trends in Genetics* **29**, 233-240,  
550 doi:<http://dx.doi.org/10.1016/j.tig.2012.10.011> (2013).
- 551 34 Mascher, M. *et al.* A chromosome conformation capture ordered sequence of the  
552 barley genome. *Nature* **544**, 427-433, doi:10.1038/nature22043 (2017).
- 553 35 Wang, J., Yang, J., McNeil, D. L. & Zhou, M. Identification and molecular mapping  
554 of a dwarfing gene in barley (*Hordeum vulgare* L.) and its correlation with other  
555 agronomic traits. *Euphytica* **175**, 331-342 (2010).

- 556 36 Turner, A., Beales, J., Faure, S., Dunford, R. P. & Laurie, D. A. The pseudo-response  
557 regulator *Ppd-H1* provides adaptation to photoperiod in barley. *Science* **310**, 1031-  
558 1034 (2005).
- 559 37 Nduulu, L. M., Mesfin, A., Muehlbauer, G. J. & Smith, K. P. Analysis of the  
560 chromosome 2(2H) region of barley associated with the correlated traits Fusarium  
561 head blight resistance and heading date. *Theoretical and Applied Genetics* **115**, 561-  
562 570, doi:10.1007/s00122-007-0590-5 (2007).
- 563 38 Hu, H. *et al.* Wild barley shows a wider diversity in genes regulating heading date  
564 compared with cultivated barley. *Euphytica* **215**, 75, doi:10.1007/s10681-019-2398-1  
565 (2019).
- 566 39 von Korff, M., Wang, H., Léon, J. & Pillen, K. AB-QTL analysis in spring barley. I.  
567 Detection of resistance genes against powdery mildew, leaf rust and scald  
568 introgressed from wild barley. *Theoretical and Applied Genetics* **111**, 583-590,  
569 doi:<http://dx.doi.org/10.1007/s00122-005-2049-x> (2005).
- 570 40 Singh, D., Dracatos, P., Derevnina, L., Zhou, M. & Park, R. F. Rph23: A new  
571 designated additive adult plant resistance gene to leaf rust in barley on chromosome  
572 7H. *Plant Breeding* **134**, 62-69, doi:10.1111/pbr.12229 (2015).
- 573 41 Dracatos, P. M. *et al.* Inheritance of Prehaustorial Resistance to *Puccinia graminis* f.  
574 sp *avenae* in Barley (*Hordeum vulgare* L.). *Mol Plant Microbe In* **27**, 1253-1262,  
575 doi:Doi 10.1094/Mpmi-05-14-0140-R (2014).
- 576 42 Xue, D.-w. *et al.* Identification of QTLs for yield and yield components of barley  
577 under different growth conditions. *Journal of Zhejiang University SCIENCE B* **11**,  
578 169-176, doi:10.1631/jzus.B0900332 (2010).
- 579 43 Xue, D. *et al.* Identification of QTLs associated with salinity tolerance at late growth  
580 stage in barley. *Euphytica* **169**, 187-196, doi:10.1007/s10681-009-9919-2 (2009).
- 581 44 Arraiano, L. S. *et al.* Contributions of disease resistance and escape to the control of  
582 septoria tritici blotch of wheat. *Plant Pathol* **58**, 910-922, doi:10.1111/j.1365-  
583 3059.2009.02118.x (2009).
- 584 45 Chartrain, L., Brading, P. A., Widdowson, J. P. & Brown, J. K. M. Partial Resistance  
585 to Septoria Tritici Blotch (*Mycosphaerella graminicola*) in Wheat Cultivars Arina and  
586 Riband. *Phytopathology* **94**, 497-504, doi:10.1094/PHYTO.2004.94.5.497 (2004).
- 587 46 Singh, V. *et al.* Phenotyping at hot spots and tagging of QTLs conferring spot blotch  
588 resistance in bread wheat. *Molecular Biology Reports* **43**, 1293-1303,  
589 doi:10.1007/s11033-016-4066-z (2016).
- 590 47 Tavella, C. M. Date of heading and plant height of wheat varieties, as related to  
591 septoria leaf blotch damage. *Euphytica* **27**, 577-580, doi:10.1007/bf00043184 (1978).
- 592 48 Wilson, R. E. Australian Septoria Nursery 1985 (AUSEN X). 55 (Western Australia  
593 Department of Agriculture, Perth, Australia, 1986).
- 594 49 Brown, J. K. M. & Rant, J. C. Fitness costs and trade-offs of disease resistance and  
595 their consequences for breeding arable crops. *Plant Pathol* **62**, 83-95,  
596 doi:doi:10.1111/ppa.12163 (2013).
- 597 50 Graner, A., Foroughi-Wehr, B. & Tekauz, A. RFLP mapping of a gene in barley  
598 conferring resistance to net blotch (*Pyrenophora teres*). *Euphytica* **91**, 229-234,  
599 doi:10.1007/bf00021075 (1996).
- 600 51 Patil, V., Bjornstad, A. & Mackey, J. Molecular mapping of a new gene  
601 Rrs4(CI11549) for resistance to barley scald (*Rhynchosporium secalis*). *Molecular*  
602 *Breeding* **12**, 169-183, doi:Doi 10.1023/A:1026076511073 (2003).

603

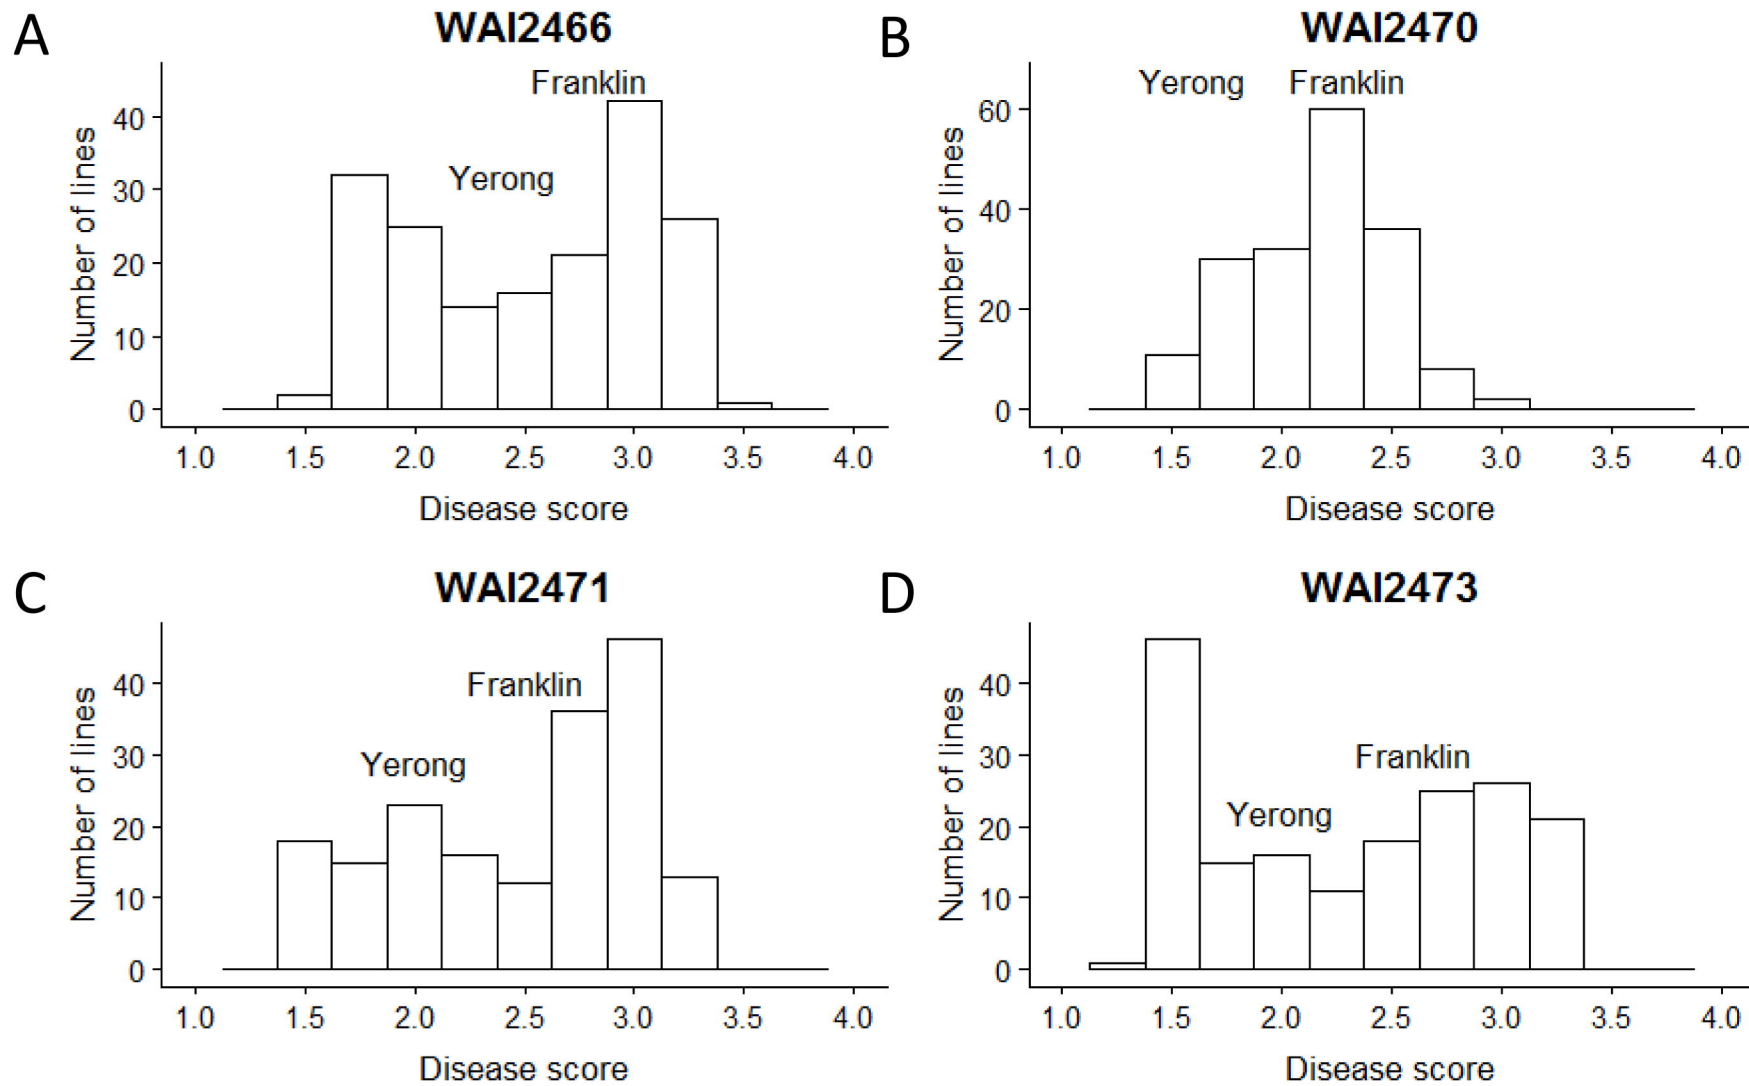

Fig. 1

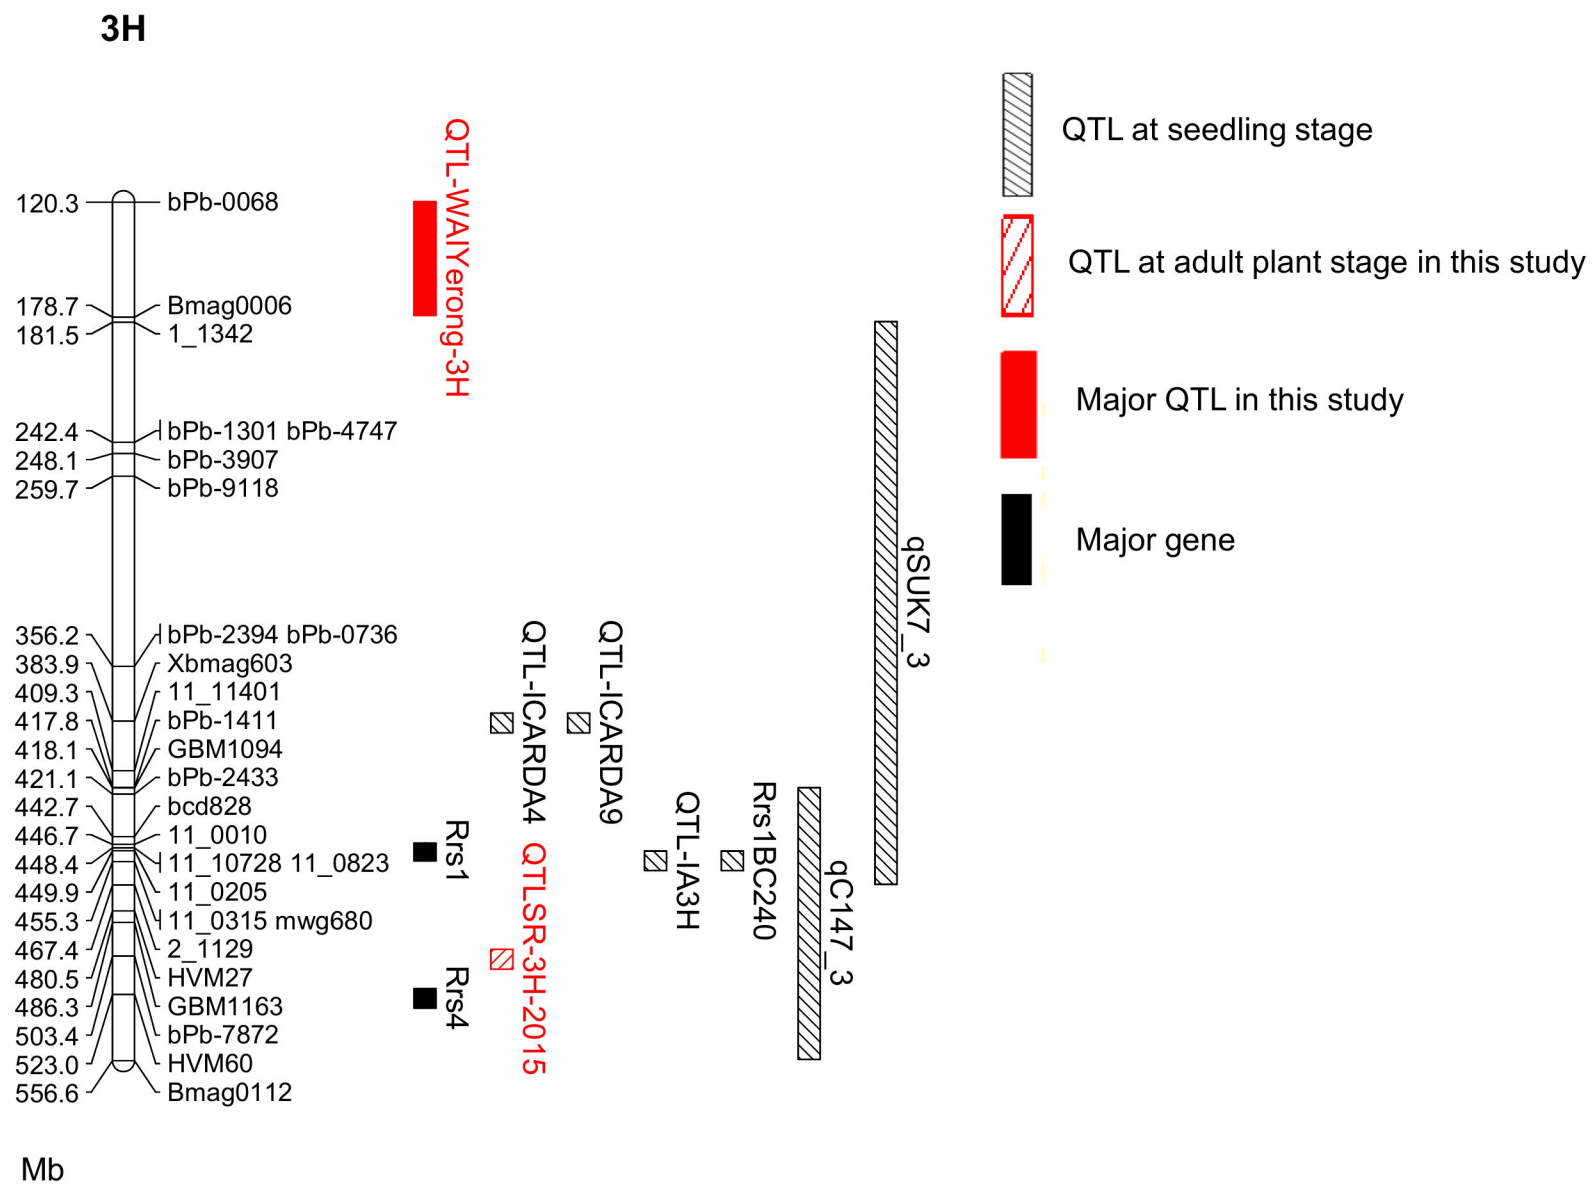

Fig. 2

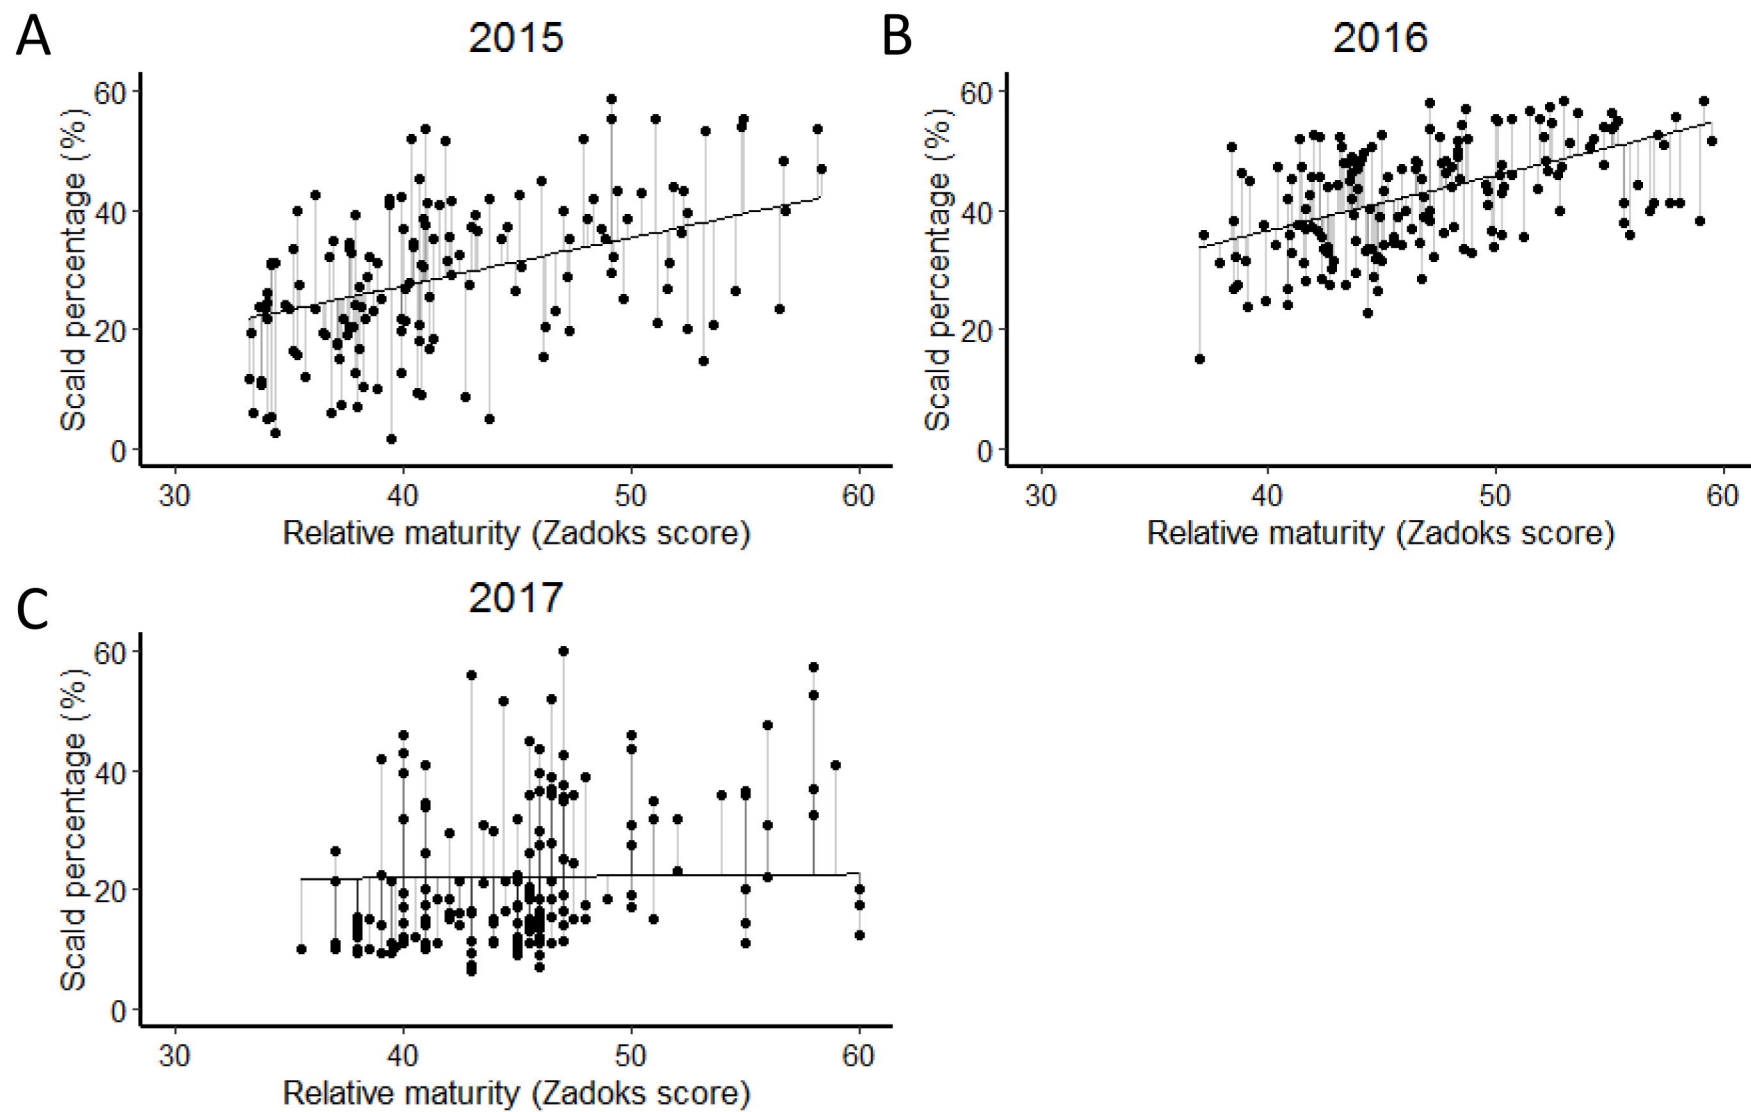

Fig. 3



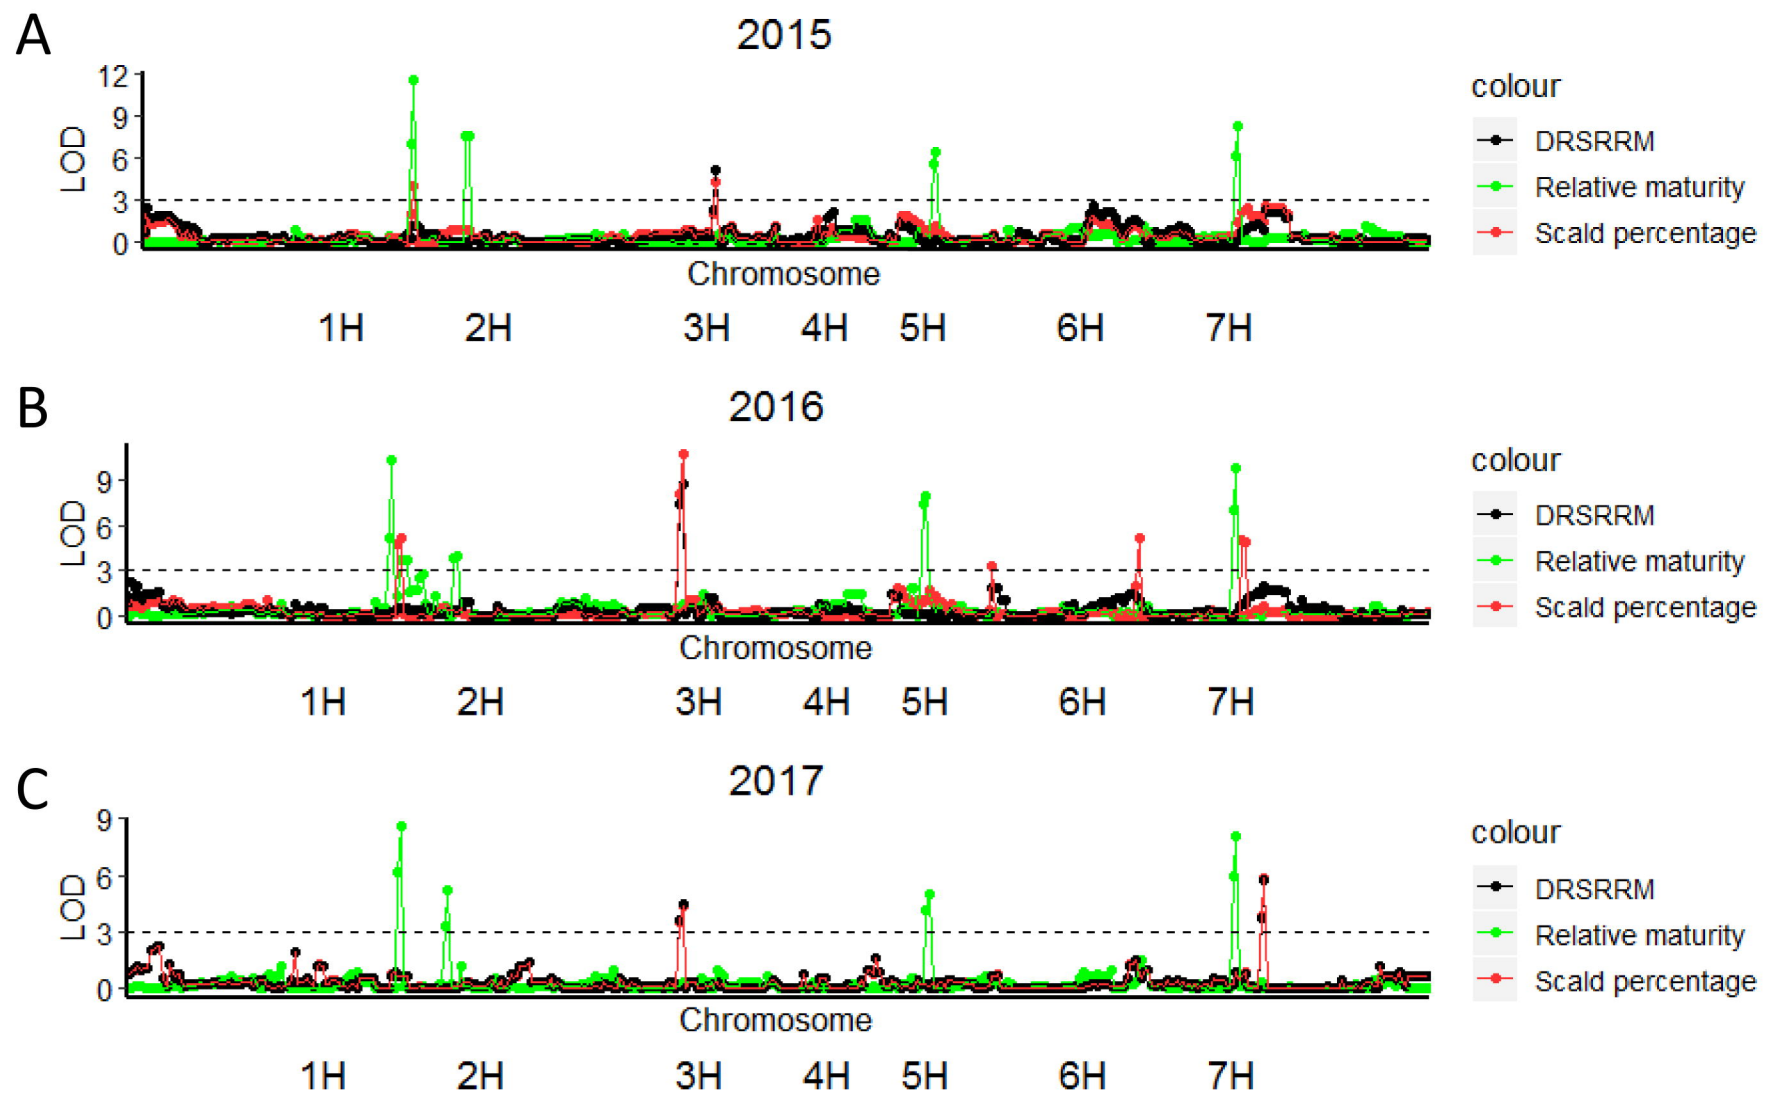

Fig. 4
